# Supplementary material for: Four hub genes regulate tumor infiltration by immune cells, antitumor immunity in the tumor microenvironment, and survival outcomes in lung squamous cell carcinoma patients
Source: publisher site journal article supplement (doi:10.18632/aging.202351), 2021-01-10
Supplement: Supplementary file [file aging-v13i3-202351-supplementary-material-SD1.pdf]

SUPPLEMENTARY FIGURES

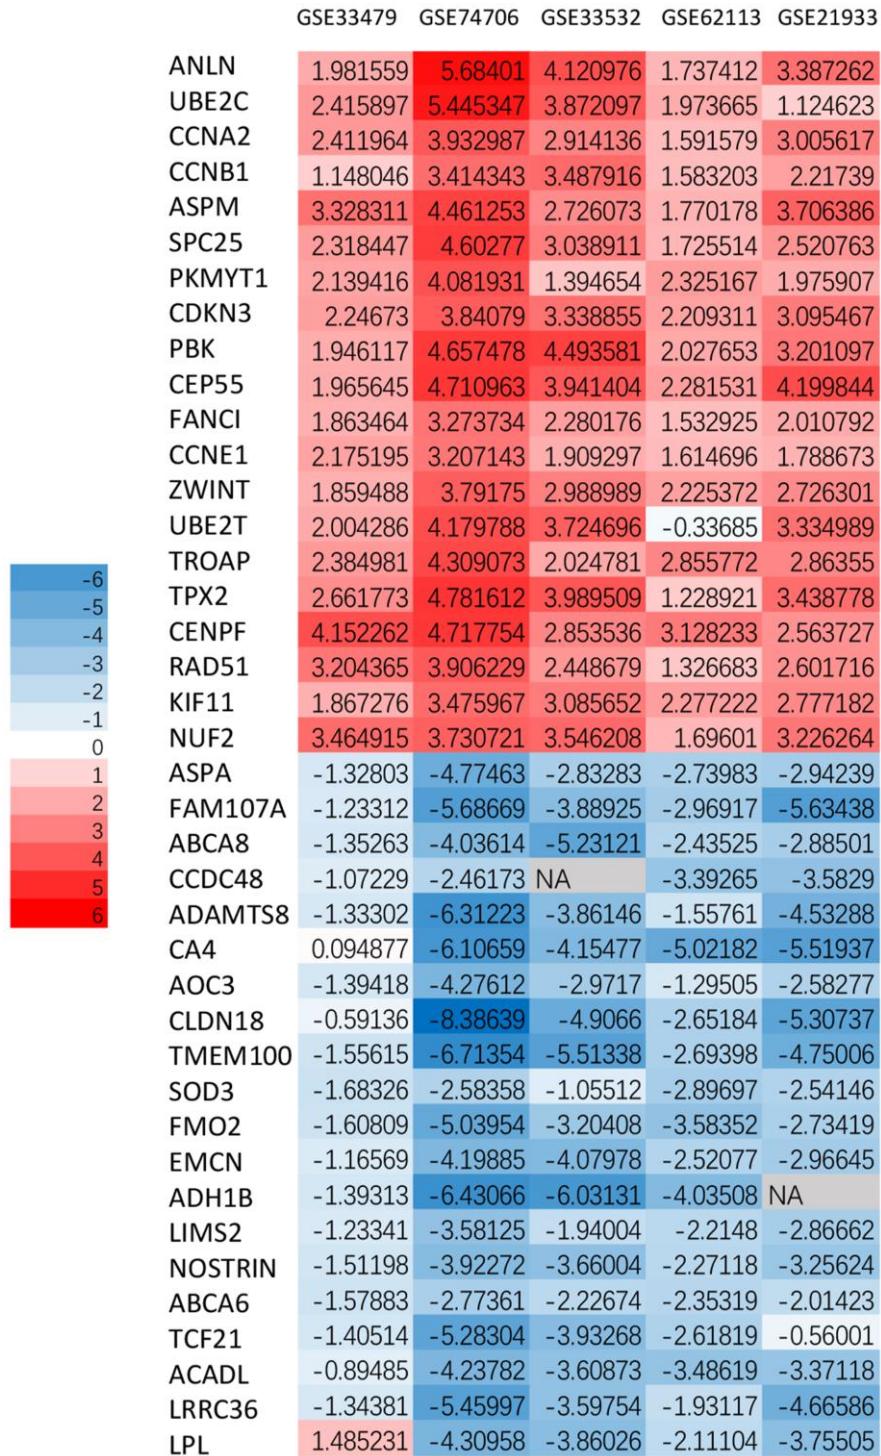

**Supplementary Figure 1. The circular visualization of the expression patterns of the top 93 DEGs and their chromosomal positions.** The heatmap shows the top 20 up-regulated genes and top 20 down-regulated genes according to their P value. The columns represent each of the five GEO datasets. Each row represents a single gene. Red and blue indicate up-regulation and down-regulation, respectively. The numbers in the heatmap indicate log (fold change) values in each dataset as calculated by the limma R package.

**A**

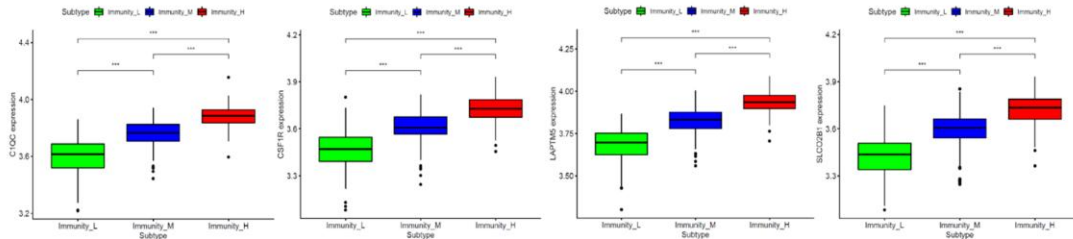

**B**

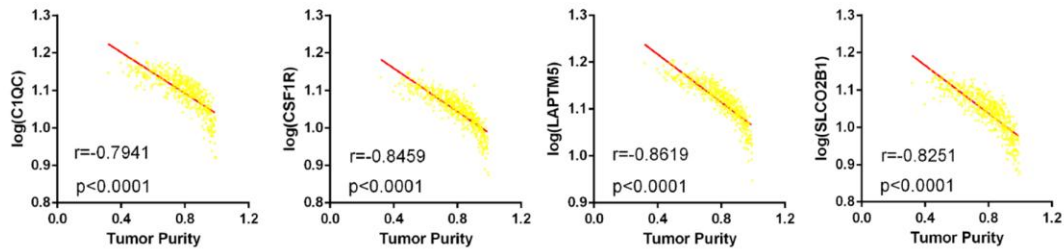

**C**

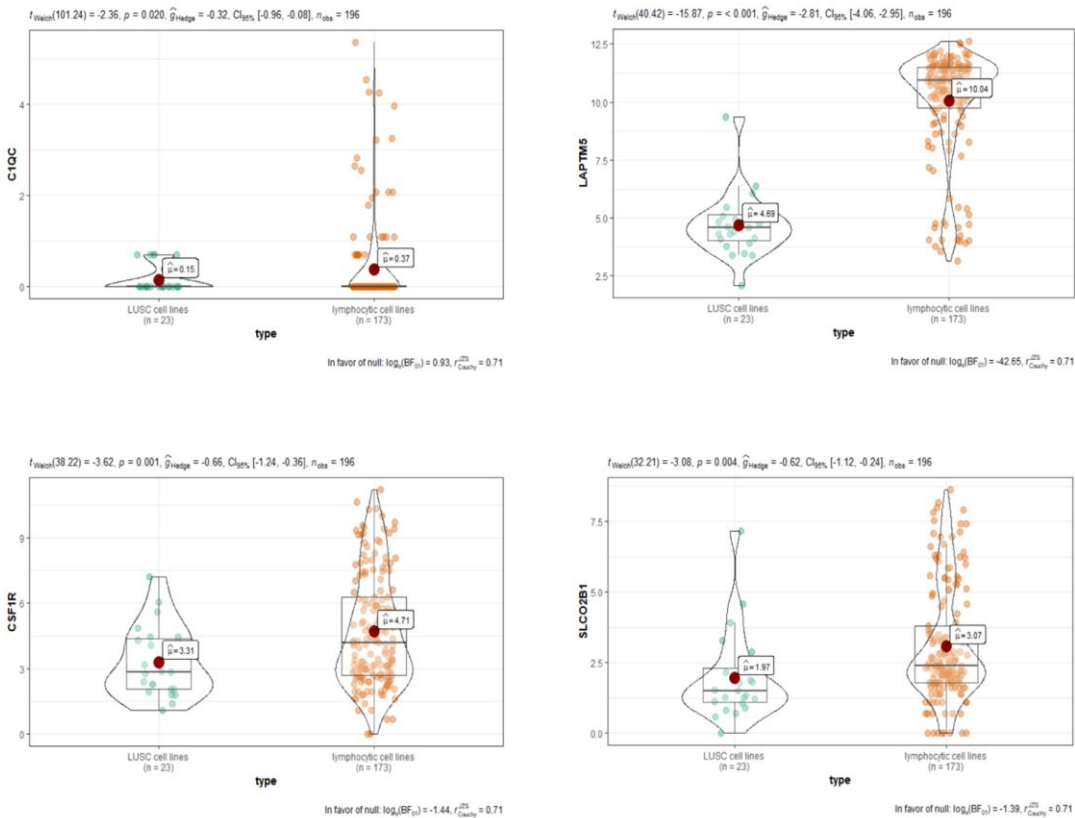

**Supplementary Figure 2. Validation of the hub genes in the TCGA-LUSC dataset. (A)** The histogram plots show the mRNA expression of *LAPTM5*, *CSF1R*, *SLCO2B1* and *C1QC* in the high, medium and low immunity LUSC subgroups. **(B)** The histogram plot shows the mRNA expression levels of *LAPTM5*, *CSF1R*, *SLCO2B1* and *C1QC* in the LUSC samples with different tumor purity levels. **(C)** The expression levels of *LAPTM5*, *CSF1R*, *SLCO2B1* and *C1QC* mRNA in the LUSC cell lines (n=23) and lymphocytic cell lines (n=167).

**A**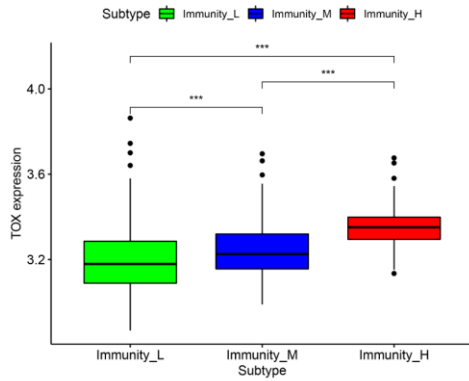**B**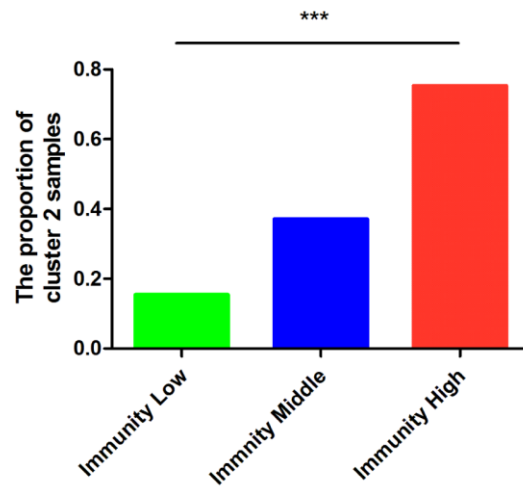

**Supplementary Figure 3.** (A) The histogram plots show the expression levels of *TOX* in the high, medium and low immunity LUSC subgroups (ANOVA test,  $p < 0.001$ ). (B) Comparison of the proportions of cluster 2 samples in the high, medium and low immunity LUSC subgroups (Chi-square test,  $p < 0.001$ ). Note: Immunity-High denotes high immunity group; Immunity-Middle denotes medium immunity group; Immunity-Low denotes low immunity group.

**A**

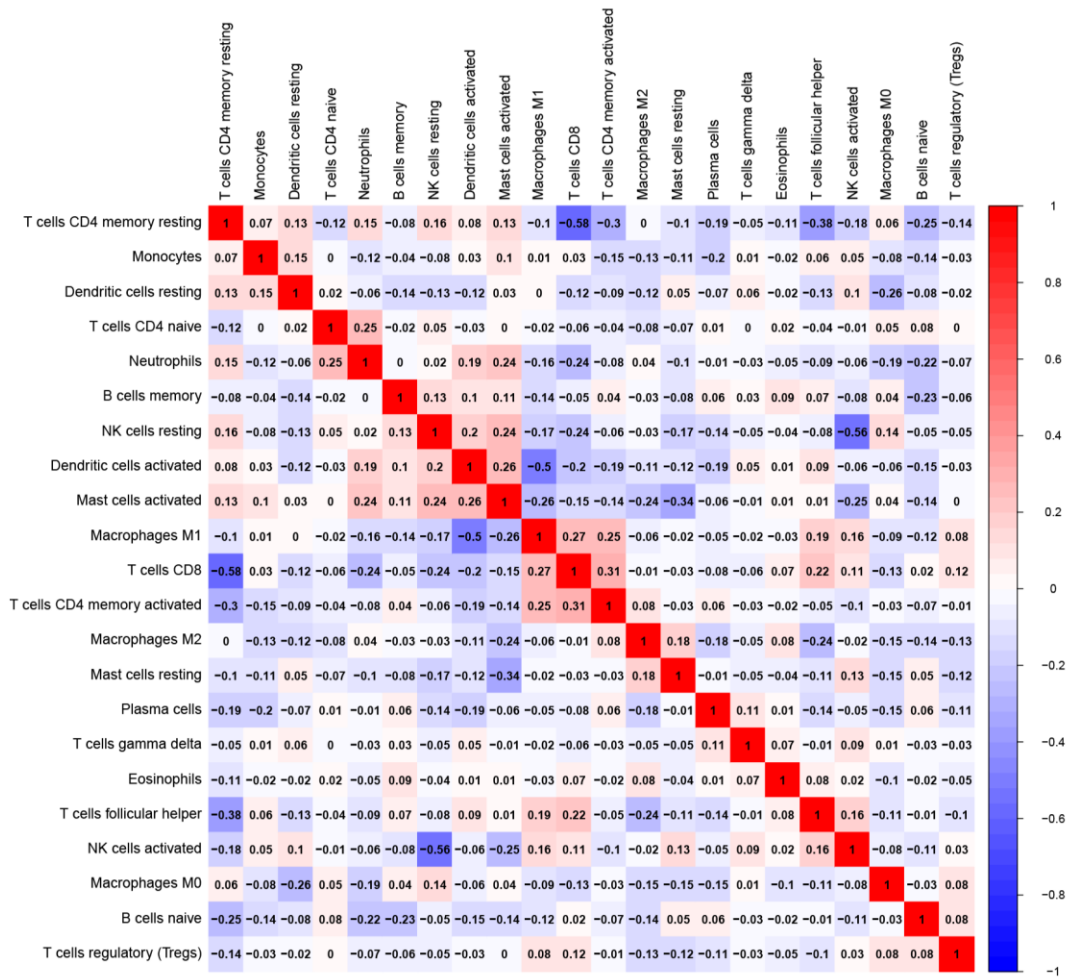

**B**

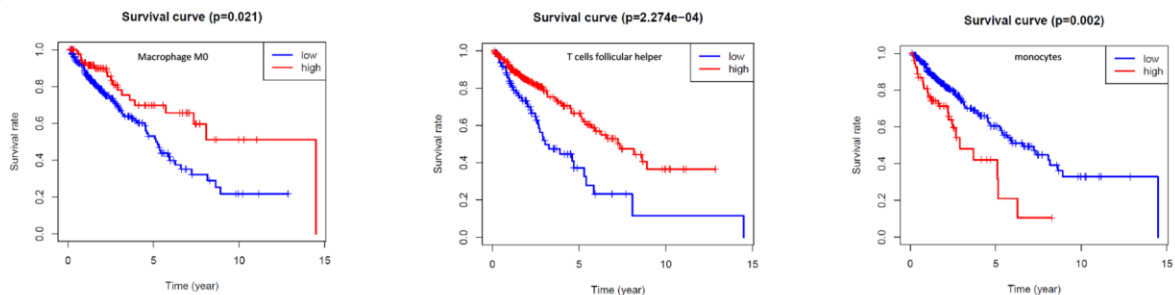

**Supplementary Figure 4.** (A) The heat map shows the proportions of 22 immune cell types in the TCGA-LUSC tumor samples as calculated with the CIBERSORT algorithm, and their correlation with the expression levels of the four hub genes, namely, *LAPTM5*, *CSF1R*, *SLCO2B1* and *C1QC* in the TCGA-LUSC dataset. (B) The correlation analysis between the proportions of follicular helper T cells, M0 macrophages and monocytes in the LUSC tissues and the overall survival time of the TCGA-LUSC patients. The red and blue lines indicate the LUSC samples with high or low proportions of follicular helper T cells, M0 macrophages, and monocytes.
